# Supplementary material for: Emersion behaviour underlies variation in gill morphology and aquatic respiratory function in the amphibious fish Kryptolebias marmoratus
Source: Oxford University Press journal article supplement (doi:10.1242/jeb.168039), 2018-01-01
Supplement: jeb168039supp.pdf [file jeb168039supp.pdf]

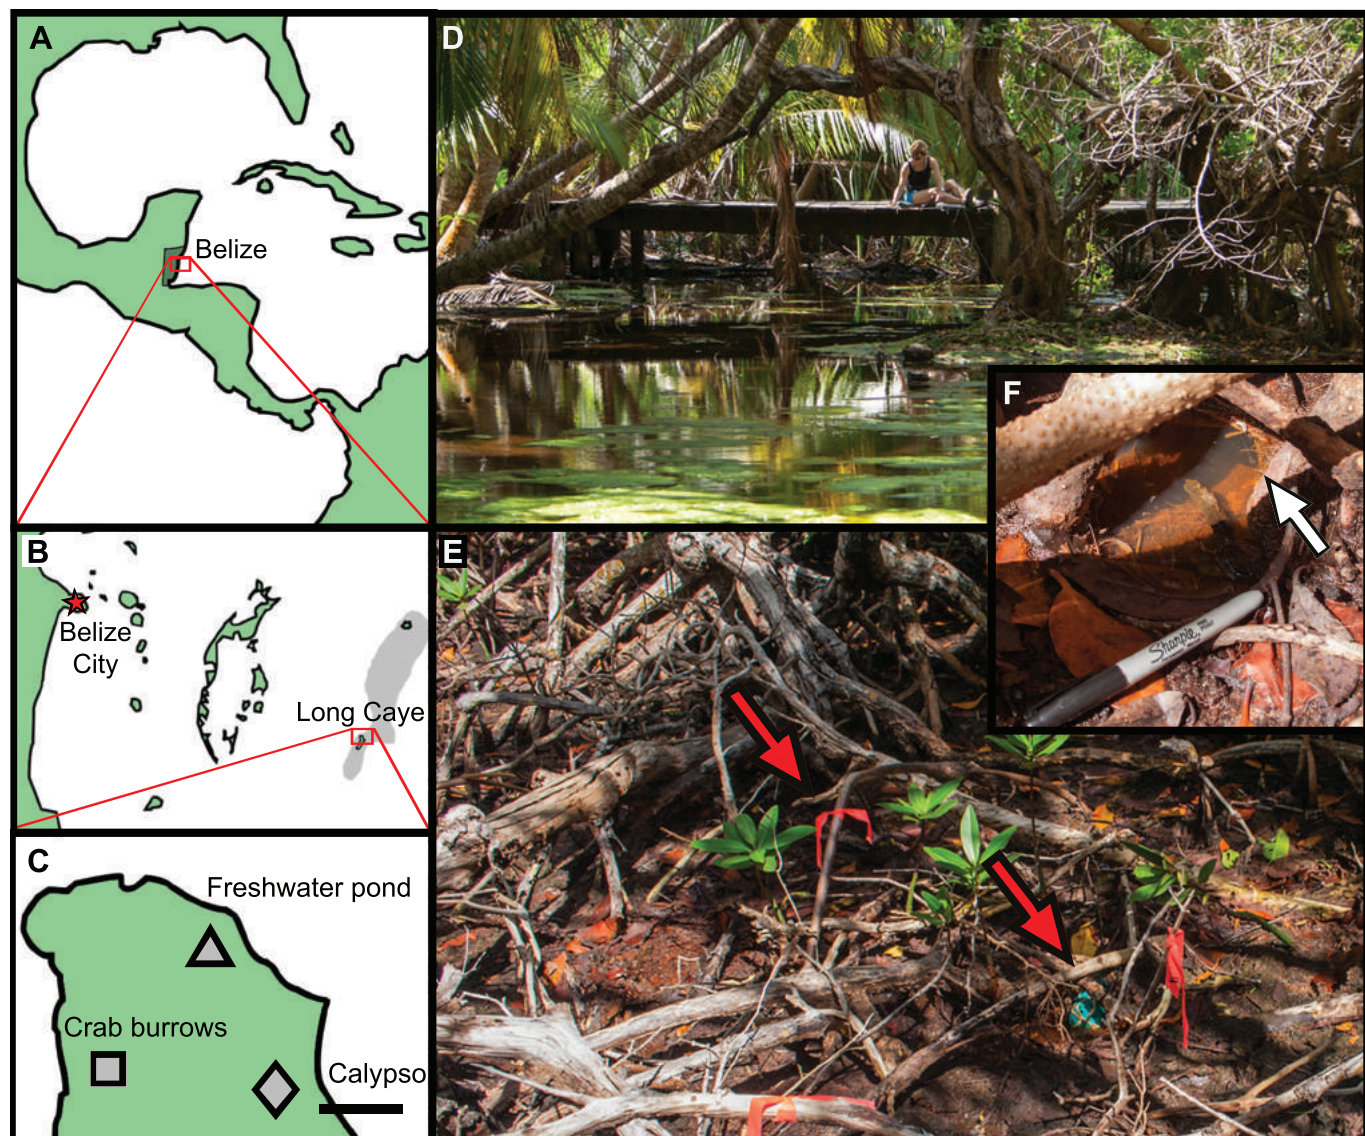

**Fig. S1. Collection locations of *Kryptolebias marmoratus* on Long Caye, Belize.** (A) Map of Central America, showing the location of Belize and the inset map (B) of the central Belize barrier reef including Long Caye, Lighthouse Reef Atoll to the east. (C) Close view of the northern tip of Long Caye showing the Calypso (diamond symbol), freshwater pond (triangle), and crab burrow (square) sampling locations. Scale bar = 200 m, north is up. (D) Photograph of the freshwater pond site. (E) Photograph of the crab burrow collection site. Crab burrows are marked in the photograph with flagging tape and overlaid red arrows. (F) Inset photo of a singular crab burrow occupied by a mangrove rivulus (white arrow). The permanent marker included for scale = 13.5 cm.

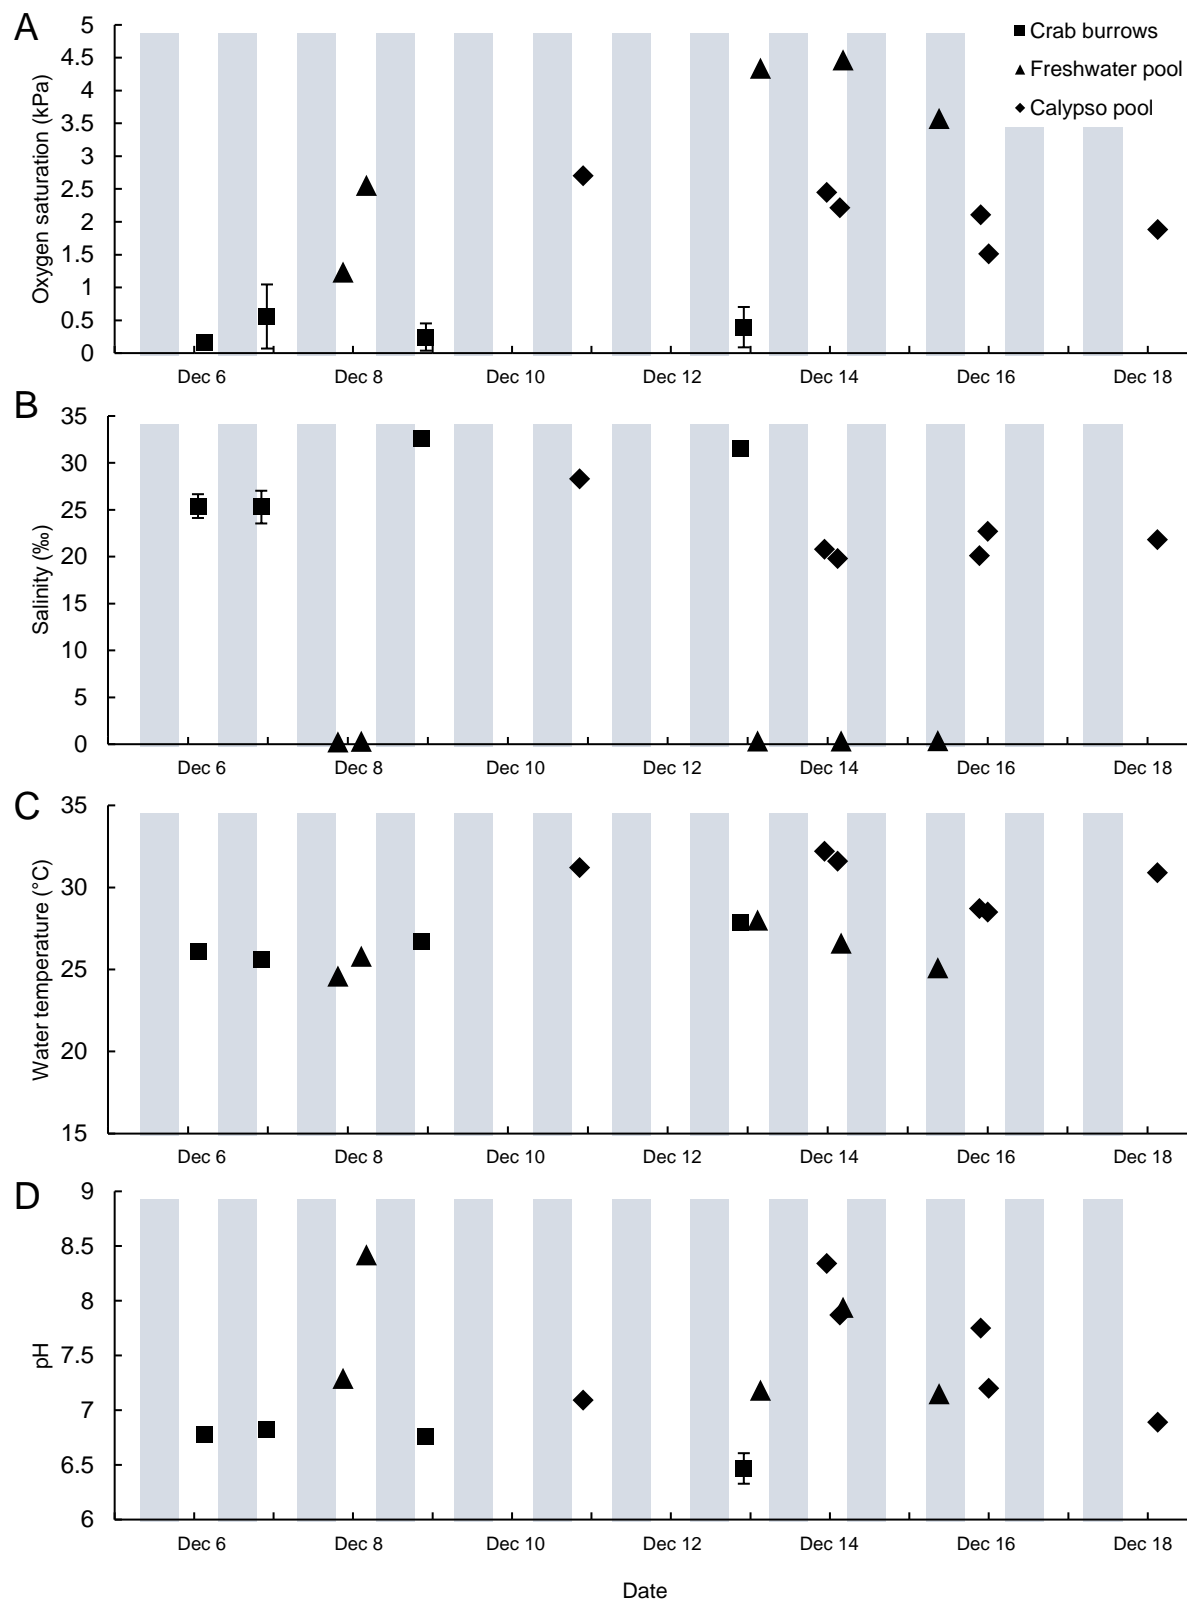

**Fig. S2. Water conditions over time at *Kryptolebias marmoratus* collection locations on Long Caye, Belize in December 2012.** (A) partial pressure of O<sub>2</sub>, (B) salinity, (C) water temperature, (D) pH of each habitat. White vertical bars represent daylight, grey vertical bars represent night. Tick-marks on the x-axis denote noon of each day. Fish from crab burrows are represented with square symbols, from the freshwater pool with triangles, and from Calypso with diamonds. Measurements of the freshwater and Calypso pools were taken from the same single location at each sampling time. Crab burrow values are means  $\pm$  SEM of the same 18 burrows measured during each sampling period.

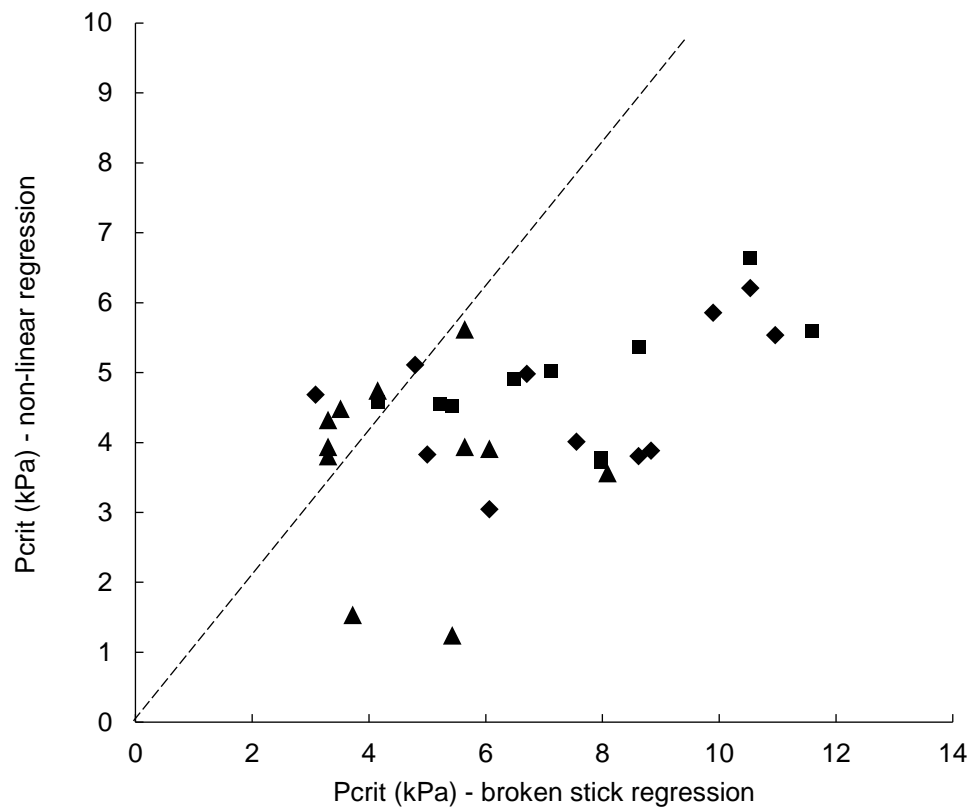

**Fig. S3.** There was a significant relationship between calculations of  $P_{crit}$  using broken stick regression and non-linear regression ( $R^2 = 0.21$ ,  $P < 0.01$ ). Fish from crab burrows are represented with square symbols, from the freshwater pool with triangles, and from Calypso with diamonds. The dashed diagonal line indicates equivalency.

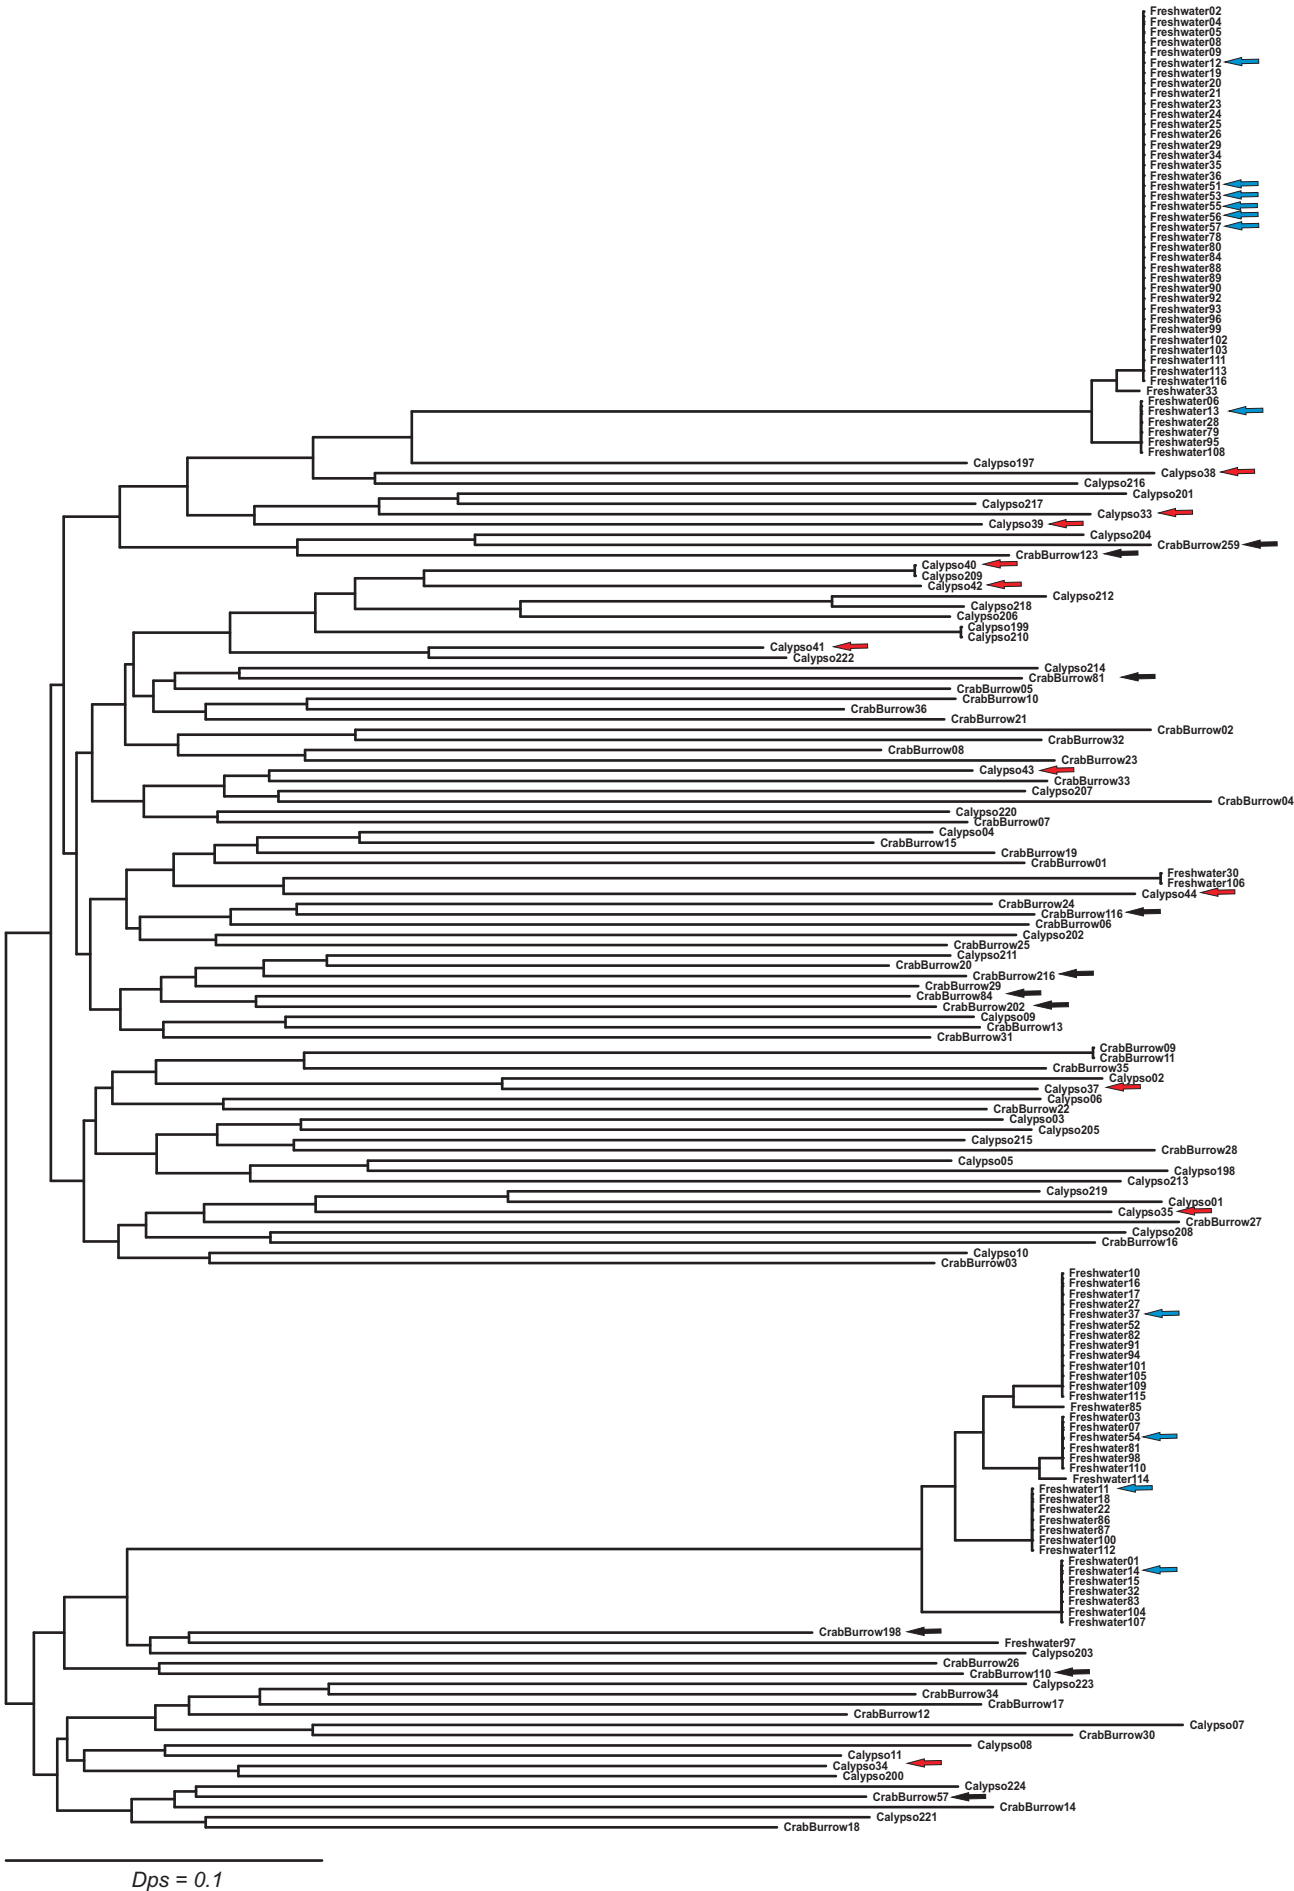

**Fig. S4. Neighbour-joining tree showing microsatellite-based genetic similarity of 178 *Kryptolebias marmoratus* collected from three sites on Long Caye, Belize.** Arrows point fish used in respiration experiments (n=32 individuals); black for crab burrows, blue for freshwater pond, and red for Calypso pond.
